# Supplementary material for: Risk factors for perineal and vaginal tears in primiparous women – the prospective POPRACT-cohort study
Source: Springer Nature journal article supplement (doi:10.1186/s12884-020-03447-0), 2020-12-01
Supplement: MOESM2 [file 18650262]

Table. Unadjusted and adjusted odds ratios for risk factors for perineal tear including women being subject to episiotomy.

| n=489                                          | 2 <sup>nd</sup> degree |                    | OASI               |                    |
|------------------------------------------------|------------------------|--------------------|--------------------|--------------------|
|                                                | OR (95% CI)            | aOR (95% CI)       | OR (95% CI)        | aOR (95% CI)       |
| <b>Age</b>                                     |                        |                    |                    |                    |
| ≤25 years                                      | Reference              | Reference          | Reference          | Reference          |
| >25 years                                      | 2.01 (1.21, 3.35)*     | 1.89 (1.07, 3.35)* | 1.56 (0.57, 4.25)  | 1.67 (0.51, 5.49)* |
| <b>BMI</b>                                     |                        |                    |                    |                    |
| ≤25 kg/m <sup>2</sup>                          | Reference              | Reference          | Reference          | Reference          |
| 25.1–30 kg/m <sup>2</sup>                      | 0.91 (0.58, 1.42)      | 1.00 (0.62, 1.62)  | 1.09 (0.47, 2.51)  | 0.97 (0.38, 2.45)  |
| >30kg/m <sup>2</sup>                           | 1.22 (0.68, 2.19)      | 1.18 (0.62, 2.24)  | 0.55 (0.12, 2.50)  | 0.28 (0.05, 1.48)  |
| <b>Education</b>                               |                        |                    |                    |                    |
| 9to <12years                                   | 0.24 (0.03, 2.20)      | 0.36 (0.04, 3.54)  | 3.22 (0.56, 18.58) | 4.53 (0.61, 33.95) |
| 12 years                                       | 0.82 (0.55, 1.21)      | 0.92 (0.6, 1.42)   | 0.63 (0.27, 1.47)  | 0.61 (0.23, 1.6)   |
| University                                     | Reference              | Reference          | Reference          | Reference          |
| <b>Heredity<sup>a</sup></b>                    |                        |                    |                    |                    |
| No                                             | Reference              | NE                 | Reference          | NE                 |
| Yes                                            | 1.33 (0.76, 2.32)      | NE                 | 1.52 (0.53, 4.35)  | NE                 |
| <b>SUI in late pregnancy</b>                   |                        |                    |                    |                    |
| No                                             | Reference              | NE                 | Reference          | NE                 |
| Yes                                            | 0.66 (0.41, 1.05)      | NE                 | 1.65 (0.74, 3.66)  | NE                 |
| <b>GA at birth</b>                             |                        |                    |                    |                    |
| Preterm/term                                   | Reference              | Reference          | Reference          | Reference          |
| Postterm                                       | 2.11 (1.09, 4.06)*     | 1.8 (0.81, 4.04)   | 2.01 (0.63, 6.48)  | 1.22 (0.28, 5.26)  |
| <b>Delivery start</b>                          |                        |                    |                    |                    |
| Spontaneous                                    | Reference              | Reference          | Reference          | Reference          |
| Induction                                      | 1.38 (0.86, 2.21)      | 0.96 (0.54, 1.74)  | 1.6 (0.67, 3.81)   | 1.33 (0.45, 3.91)  |
| <b>Epidural analgesia</b>                      |                        |                    |                    |                    |
| No                                             | Reference              | Reference          | Reference          | Reference          |
| Yes                                            | 1.76 (1.21, 2.55)*     | 0.8 (0.53, 1.2)    | 2.06 (0.98, 4.34)* | 0.84 (0.33, 2.11)  |
| <b>Oxytocin stimulation</b>                    |                        |                    |                    |                    |
| No                                             | Reference              | Reference          | Reference          | Reference          |
| Yes                                            | 1.76 (1.21, 2.55)*     | 1.22 (0.78, 1.92)  | 2.06 (0.98, 4.34)* | 0.84 (0.33, 2.11)  |
| <b>Duration of active 2<sup>nd</sup> stage</b> |                        |                    |                    |                    |
| ≤15 min                                        | 0.74 (0.45, 1.23)      | 0.77 (0.45, 1.31)  | 1.2 (0.49, 2.92)   | 1.52 (0.57, 4.03)  |
| 16–60 min                                      | Reference              | Reference          | Reference          | Reference          |
| >60 min                                        | 1.23 (0.80, 1.92)      | 1.08 (0.67, 1.72)  | 0.8 (0.30, 2.11)   | 0.55 (0.19, 1.57)  |
| <b>Maternal position at birth</b>              |                        |                    |                    |                    |
| Flexible sacrum positions                      | Reference              | Reference          | Reference          | Reference          |
| Reduced sacrum flexibility                     | 0.94 (0.59, 1.49)      | 0.60 (0.36, 1.00)  | 1.07 (0.42, 2.75)  | 0.67 (0.23, 1.98)  |
| <b>Mode of delivery</b>                        |                        |                    |                    |                    |
| Spontaneous                                    | Reference              | Reference          | Reference          | Reference          |
| Vacuum                                         |                        |                    |                    |                    |

|                                          |                    |                    |                     |                     |
|------------------------------------------|--------------------|--------------------|---------------------|---------------------|
| extraction                               | 3.37 (1.92, 5.93)* | 3.40 (1.83, 6.31)  | 4.92 (2.04, 11.84)* | 4.97 (1.79, 13.83)* |
| <b>Fetal scalp electrode</b>             |                    |                    |                     |                     |
| No                                       | Reference          | Reference          | Reference           | Reference           |
| Yes                                      | 1.44 (0.99, 2.08)  | 1.26 (0.82, 1.92)  | 2.76 (1.23, 6.19)*  | 2.41 (0.98, 5.94)   |
| <b>Fetal presentation</b>                |                    |                    |                     |                     |
| Occiput anterior                         | Reference          | Reference          | Reference           | Reference           |
| Occiput posterior                        | 1.37 (0.50, 3.74)  | 1.45 (0.5, 4.19)   | 3.24 (0.80, 13.22)  | 4.05 (0.83, 19.7)   |
| <b>Hand or arm presenting fetal part</b> |                    |                    |                     |                     |
| No                                       | Reference          | NE                 | Reference           | NE                  |
| Yes                                      | 0.99 (0.55, 1.76)  | NE                 | 0.77 (0.22, 2.68)   | NE                  |
| <b>Fetal weight</b>                      |                    |                    |                     |                     |
| ≤4000 g                                  | Reference          | Reference          | Reference           | Reference           |
| >4000 g                                  | 2.56 (1.44, 4.57)* | 2.31 (1.25, 4.29)* | 5.66 (2.39, 13.40)* | 6.00 (2.32, 15.50)* |
| <b>Fetal head circumference</b>          |                    |                    |                     |                     |
| ≤35 cm                                   | Reference          | NE                 | Reference           | NE                  |
| >35 cm                                   | 1.91 (1.31, 2.77)* | NE                 | 3.58 (1.55, 8.27)*  | NE                  |

Unadjusted and adjusted odds ratios for risk factors for perineal tear using multinomial logistic regression. The group of women with second-degree perineal tear and OASI were compared with women with no or first-degree perineal tear. Women having an episiotomy were included in this analysis. <sup>a</sup>Heredity of pelvic floor dysfunction and/or connective tissue deficiency; \*Significant at level  $p < 0.05$ . aOR, adjusted odds ratio; BMI, body mass index; CI, confidence interval; GA, gestational age; NE, not estimated; OASI, obstetric anal sphincter injury; OR, odds ratio; SUI, stress urinary incontinence.
